# 1                    **Confinement Discerns Swarms from Planktonic Bacteria**

2    Weijie Chen<sup>1,2</sup>, Neha Mani<sup>1,†</sup>, Hamid Karani<sup>1</sup>, Hao Li<sup>2</sup>, Sridhar Mani<sup>2,\*</sup>, Jay X. Tang<sup>1,\*</sup>

3    <sup>1</sup> Department of Physics, Brown University, 182 Hope St., Providence, RI 02912, USA

4    <sup>2</sup> Department of Medicine, Albert Einstein College of Medicine, 1300 Morris Park Ave, Bronx,  
5    NY10461, USA

6    \* Corresponding Authors

7    Email: [sridhar.mani@einsteinmed.org](mailto:sridhar.mani@einsteinmed.org); [jay\\_tang@brown.edu](mailto:jay_tang@brown.edu)

8    † Present address: Hunter College High School, 71 E 94th St, New York, NY 10128, USA

## 9    **Author Contribution**

10    W.C., N.M., J.X.T., and S.M. conceived and designed the work. W.C. and N.M. performed the  
11    experiments and analyzed the data. H.K. performed the computational simulations. H.L. isolated  
12    the bacteria strains and prepared the mouse tissues. W.C., H.K., S.M., and J.X.T. wrote the paper.

## 13    **Conflict of interest**

14    Weijie Chen, Neha Mani, Jay X. Tang and Sridhar Mani filed a U.S. patent application  
15    (Application No. 63033369). Other authors declare no conflict of interest.

## 16    **Acknowledgment**

17    We thank Daniel B. Kearns from Indiana University at Bloomington for providing the *Bacillus*  
18    *subtilis* 3610 bacteria strain, Cori Bargmann at Rockefeller University for gifting us the bacteria  
19    strain *Serratia marcescens* Db10. We thank Hui Ma for his assistance in the clean room and  
20    discussion of the work. NIH Grant 1R01CA222469-01 supported this work.

## 21 **Abstract**

22 Powered by flagella, many species of bacteria exhibit collective motion on a solid surface  
23 commonly known as swarming. Physical changes like cell elongation and hyper flagellation have  
24 been shown to accompany swarming phenotype. Less noticeable, however, are the contrasts of  
25 collective motion between the swarming cells and the planktonic cells of comparable cell density.  
26 Here, we show that when confined by microwells of specific sizes mounted on a soft agar surface,  
27 novel bacteria *Enterobacter* sp. SM3 under swarming condition exhibited “single-swirl” motion  
28 pattern distinct from “multi-swirl” motion pattern formed by its concentrated planktonic  
29 counterpart. We hypothesize that “rafting behavior” of the swarming bacteria upon dilution might  
30 account for the motion pattern difference. This was further validated through computational  
31 simulation where swarming cells are modeled by lower repulsion and stronger alignment among  
32 them than planktonic cells. Our new technical approach also enabled us to observe swarming on a  
33 non-agar tissue surface.

## 34 Introduction

35 Motility is an essential characteristic for bacteria. Although energy-consuming, it provides high  
36 returns, enabling cells to uptake nutrients efficiently and escape from noxious environments<sup>1</sup>. In a  
37 host environment, bacterial motility is also an essential phenotype that intimately relates to  
38 virulence through complex regulatory networks<sup>2</sup>. Swimming and swarming are two common  
39 motility phenotypes mediated by flagella. Whereas planktonic phenotype defines the motility of  
40 individual bacteria, a collective movement powered by rotating flagella<sup>3</sup> on a partially solidified  
41 surface defines swarming<sup>4</sup>. In swarming, bacteria utilize their flagella to navigate, two-  
42 dimensionally, through a medium and acquire necessary molecules for the maintenance of  
43 homeostasis and overall survival<sup>5</sup>. Morphological changes like cell elongation may or may not  
44 occur in all swarming bacteria<sup>6</sup>. Thus, concentrated swimming bacteria are often called “a swarm  
45 of bacteria” without requiring precise identification of swarming motility, per se. Nevertheless,  
46 microbiologists believe that swarming and swimming are fundamentally different motility types.  
47 For instance, studies found that compared with swimming cells, the requirement for flagella torque  
48 is higher for swarming *B. subtilis*<sup>7</sup>; swarming *E. coli* remodel their chemotaxis pathway<sup>8</sup>; and in  
49 swarming *P. aeruginosa*, the production of virulence factors and antibiotic resistance increases<sup>9</sup>.  
50 A recent study has demonstrated a medically relevant distinction between swarming and  
51 swimming: a particular strain of swarming endobacteria protect against mice intestinal  
52 inflammation while their swimming counterparts could not<sup>10</sup>. The evidence to date that shows  
53 swarming is different from swimming comes mostly from biological data. However, precise  
54 biophysical visualization and quantitation of these differences are lacking. In this report, using  
55 *Enterobacter* sp. SM3, a novel bacteria strain that possesses both swimming and swarming  
56 motilities, we show distinct biophysical characteristics between these two types of motility under  
57 confined, circular geometry of a particular range of sizes.

58 Studies have shown that geometric constraints have profound influence on patterns of  
59 microswimmers' collective motion. For example, these constraints may create mesoscopic or  
60 macroscopic coherent structures such as swirls and jets<sup>11-13</sup>. Circular confinement, in particular,  
61 could stabilize a suspension of motile bacteria into a spiral vortex<sup>14-16</sup>. Here, we compare the  
62 behaviors of bacteria in swarming and planktonic states under quasi-2D circular confinement.  
63 Many species of bacteria show distinctive motion patterns while confined. This characteristic may

64 lead to future diagnostic applications since there are growing associations between bacterial  
65 swarming and virulence pathologies.

## 66 **Results**

### 67 **Swarming *Enterobacter* Sp. SM3 forms large single swirls up to 100 $\mu\text{m}$ diameter**

68 A novel bacterial strain *Enterobacter* Sp. SM3 (NCBI BioProject PRJNA558971), isolated in 2014  
69 from DSS induced clitic mice, has been previously studied for motility<sup>17</sup> and infectivity<sup>10</sup>. SM3 is  
70 a strong swarmer, expanding rapidly on 0.5% agar with collective motion of multilayers of cells  
71 at the edge. We mounted a PDMS chip containing circular microwells on the agar so that bacteria  
72 in confinement could rotate for more than 3 hours (details with illustration in Methods). Under  
73 confinement in circular wells in the diameter range of 31-90  $\mu\text{m}$ , swarming SM3 shows single  
74 swirls. In contrast, SM3 planktonic cells concentrated from the liquid medium form mesoscale  
75 vortices (multiple swirls) in the same size range, with the exception of the smallest well diameter  
76 of 31  $\mu\text{m}$ . A clear difference is shown at the well diameter of 74  $\mu\text{m}$  (Fig. 1A-D, Movie S1 & S2).  
77 This striking difference persists in several well depths, except that the concentrated cells yields  
78 small but non-zero vortex order parameter (VOP, defined as illustrated in Fig. 1E) in deeper wells,  
79 as opposed to nearly zero VOP in shallow wells (Fig. 1F).

80 The confinement well diameter has strong influence on the motion pattern in the wells. In smaller  
81 wells like 31  $\mu\text{m}$ , even concentrated planktonic SM3 forms a single vortex (Fig. 2A) whereas in  
82 larger wells, such as ones of 112  $\mu\text{m}$  diameter, swarming SM3 also breaks into mesoscale vortices  
83 (Fig. 2B). The phase diagram shows a single swirl in small confinement for both types. The  
84 patterns diverge as confinement size increases, but they converge towards multiple swirls as  
85 confinement size reaches 144  $\mu\text{m}$  and larger (Fig. 2C). To further compare the dynamics of the  
86 confined swarming and swimming SM3, spatial correlation of the velocity field was calculated for  
87  $d = 90 \mu\text{m}$  where the motion patterns differ for swarming and swimming SM3 and for  $d = 500 \mu\text{m}$   
88 where both motilities show mesoscale vortices (see method). We computed the correlation  
89 function for the inscribed square within a well, which shows the extent to which the velocity at an  
90 arbitrary location correlated with the velocity at a distance of  $\Delta r$  away from that location. In 90  
91  $\mu\text{m}$  wells, swarming SM3 velocity correlates positively or negatively throughout the whole well  
92 (negative values have resulted from the opposite sides of a single swirl). In contrast, swimming

93 velocity of planktonic cells of comparable concentration does not correlate anymore as  $\Delta r$  went up  
94 beyond 25  $\mu\text{m}$  (Fig. 2D). However, in a large open space where both swarming and swimming  
95 SM3 break into small vortices, the correlation functions look similar. The characteristic length as  
96 the curve first crosses  $C_r(\Delta r) = 0$ , which also represents the size of the mesoscale vortices, of  
97 planktonic SM3 is 27  $\mu\text{m}$  and 33  $\mu\text{m}$  for swarming SM3 (Fig. 2E).

98 We also tested other bacteria such as *Enterobacter* Sp. SM1, *Serratia marcescens* (including one  
99 lab strain Db10 and another strain H3 isolated from a human patient), *Citrobacter koseri* (H6), and  
100 *Bacillus subtilis* 3610. All the tested strains showed similar motion pattern divergence between  
101 confined planktonic cells and swarming cells like SM3 with the exception of *B. subtilis* (Fig. S1A,  
102 see discussion).

### 103 **The large single swirl behavior is indicative of cohesive cell-cell interaction**

104 We performed several experiments to explore the cause for the divergence of motion patterns in  
105 confinement. First, we rule out cell density difference as the reason for the difference in the  
106 confined motion patterns by concentrating planktonic cells to comparable density to that of a  
107 naturally expanding swarm on agar (see methods) before mounting the PDMS chip. Second, we  
108 noticed that SM3 tends to get elongated when they swarm. We hypothesize that elongated bacteria  
109 may enhance the local alignment of the rod-shaped cells and increase the size of vortices in  
110 mesoscale turbulence<sup>18</sup>. Thus, we treated SM3 planktonic cells with Cephalexin (CEP) which has  
111 been shown to elongate *E. coli*<sup>19</sup>. This treatment indeed caused the cell length to reach that of  
112 swarming cells on average (Fig. 3A). However, we found no significant change following  
113 centrifugation and CEP treatment of the planktonic SM3 (Fig. 3B). Although CEP treated  
114 planktonic SM3 has similar cell length, cell density, and cell speed as that of swarming SM3, we  
115 could not restore the single swirl pattern in 74  $\mu\text{m}$  confinement wells (Fig. 3C). Third, noticing a  
116 surfactant rim on the swarming SM3 colony edge, we conjectured that surfactants secreted by  
117 swarming SM3 might help align the swarmers in confinement. Surfactin was added in several  
118 concentrations to planktonic SM3 in order to test whether it could promote a single swirl pattern.  
119 However, it did not establish a stable single swirl. Last but not least, we found that adding  
120 lyophilized swarming supernatant to swimming SM3 also did not help increase the VOP (Fig. 3C).

121 Unable to make the concentrated planktonic SM3 form a single swirl in the 74  $\mu\text{m}$  well, we tackled  
122 the problem from another angle, by altering the conditions of swarming SM3 in order to break the  
123 single swirls. Initially, we tried to physically “damage” the swarming colony by rubbing the  
124 swarming colony gently with a piece of PDMS offcut. This operation did not break the single swirl  
125 pattern in the wells (Fig. 3D). Then, 0.2% D-mannose was added to the swarming colony to de-  
126 cluster bacteria bundles due to cells’ sticking to each other. However, this treatment could not alter  
127 the single swirl pattern, either (Fig. 3D). Finally, we diluted the swarming cells in LB by 20-fold.  
128 After re-concentrating the cells by centrifugation and removing extra LB to recover the initial cell  
129 density, these “swarming” SM3 cells were pipetted back on the agar plate. After this treatment,  
130 the previous single swirl turned to multiple swirls under the confinement (Fig. 3D), suggesting that  
131 these cells now behave much like planktonic cells. We conclude that the single swirl pattern  
132 depends on cohesive cell-cell interaction mediated by biochemical factor/s removable by matrix  
133 dilution.

#### 134 **Diluted swarming SM3 show unique dynamic clustering patterns**

135 We suspected that specific interactions between the neighboring swarming cells were weakened  
136 or even diminished upon dilution with the Luria broth (LB) medium. A fifty (50)  $\mu\text{L}$  water droplet  
137 was applied to the swarming and the concentrated planktonic SM3 colony edges to investigate the  
138 potential alignment among the cells at a microscopic scale within the bacterial colony. In the  
139 diluted swarming colony, groups of cells formed bacterial rafts, a characteristic feature previously  
140 associated with gliding motility<sup>3,20</sup>. Those cells within a polar cluster moving in the same direction  
141 in a cohesive pack at the same speed (Movie S3). In contrast, upon dilution of the concentrated  
142 planktonic SM3, the cells disperse uniformly, and their moving directions appear random (Movie  
143 S4). Swarming SM3 cells tend to move together near the agar surface, while planktonic SM3 cells  
144 swim freely in the bulk fluid (Fig. 4A-B). We used the MATLAB PIV toolkit to track the moving  
145 bacteria in the image sequences of diluted swarming and planktonic SM3 for comparison. We  
146 found that swarming SM3 formed clusters with more than 20 cells on average, while we did not  
147 see such clusters of planktonic SM3 cells (Fig. 4C-D). The lingering clusters of cells in the  
148 swarming phase upon dilution point to stronger cell-cell cohesive interaction than between  
149 planktonic cells.

## 150 **Numerical simulation reveals cell-cell interaction to be the key player**

151 To further verify that rafting in swarming is a crucially relevant factor to the motion pattern  
152 discrepancy, we performed computer simulations using the Zonal Model where the interactions  
153 among the moving particles (short-range repulsion, velocity alignment, and anti-alignment) are  
154 considered, all as functions of the particle-particle distance<sup>21,22</sup>. The speed of the particles is fixed  
155 for simplicity, but the initial particle positions and initial moving directions are randomized. In the  
156 simulations, we interpret the rafting as a lower repulsion force and stronger alignment among the  
157 swarmers (see methods and SI methods). We simulated the situation of confined swarmers and  
158 planktonic cells in different sizes of circular confinement, as in the experiments. The simulation  
159 results mirror the experiment results well: both swarmers and planktonic cells start with single  
160 swirl pattern; as the circle size is increased, the planktonic cells break into multi-swirl motion  
161 pattern earlier than the swarmers and finally both converge to multi-swirl region (Fig. 5A,  
162 compared with Fig. 2C, also see Fig. S2 and Movie S7). We then performed the “dilution”  
163 simulation for both states, finding that swarming cells form dynamic clusters when the cell density  
164 is above  $\rho = 235$  whereas the planktonic cells form a “gas” phase without clustering at all densities  
165 (Fig. 5B, Movie S8). This result echoes the experimental results in Fig. 4A. Thus, by encoding  
166 stronger cell-cell interaction among the swarming cells, we recovered the experimental results in  
167 both confinement and dilution experiments.

## 168 **Identifying SM3 motility type on mice mucosal surface**

169 The difference in confined motion patterns enables us to detect bacterial swarming on surfaces  
170 other than agar, including physiological environments such as on a mucosal surface. We are  
171 unaware of any previous studies or examples regarding bacterial swarming on non-agar surfaces,  
172 likely due to technical challenges in dealing with uneven or non-controlled surfaces. The mouse  
173 intestinal tissue, for instance, is more than 1 mm thick and non-transparent. Since light cannot  
174 penetrate the tissue, observing bacteria directly on the tissue surface is not feasible. Staining or  
175 fluorescence labeling may alter the bacterial swarming motility (e.g. SM3 becomes non-swarming  
176 once GFP labeled. Unpublished observation). If labeled biochemically, the fluorescence signal  
177 weakens when the cells reproduce (e.g., there will be progressively less cell wall labeling of SM3  
178 with Alexa Fluor 488 when cells divide). Using fluorescent beads coated PDMS chips mounted

179 on SM3 inoculated C57BL6 mouse intestine tissue, we were able to detect swarming motility  
180 based on the swirling motion of the beads. This experiment on the mouse intestine tissue confirms  
181 that bacterial swarming indeed occurs on a non-agar, physiologically relevant surface (Fig. S3;  
182 Movie S5&6, also see SI method).

## 183 **Discussion**

184 Mounting PDMS chip on a soft agar plate, we have shown the motion pattern differences between  
185 confined planktonic and swarming *Enterobacter* sp. SM3 in the size range of  $40 \mu\text{m} \leq d \leq 90 \mu\text{m}$ .  
186 Compared with previous work, our experimental setup has the advantage of ensuring stable and  
187 sustainable patterns. First, PDMS material does not harm living bacteria cells and is permeable to  
188 oxygen<sup>23</sup>, which prevents suffocation. Second, we mounted the microchip on a soft agar containing  
189 over 97% water, which, via permeability and capillary flow, automatically fills the wells. Finally,  
190 the LB agar also provides the necessary nutrients to fuel the bacterial movement in the wells.  
191 Therefore, bacterial cells confined in the microwells remain motile for hours, much longer than in  
192 droplets surrounded by mineral oil<sup>14,19</sup> or in microfluidic chambers with glass surfaces<sup>11,16</sup>, where  
193 bacteria movement typically lasted no more than 10 minutes.

194 Prior studies have proposed different models to explain the circularly confined motion of rod-  
195 shaped swimmers<sup>15,19,24</sup>. However, these theories cannot explain the motion pattern difference we  
196 observed for confined swarming and planktonic SM3. Noticing that swarming SM3 washed in LB  
197 lost the single swirl pattern, we hypothesize that other than cell length or cell speed, the strong  
198 cell-cell interaction may be a key factor responsible for the persistence of single swirls in the wells.  
199 The mechanism of the rafting phenomenon of swarming cells has not been fully deciphered yet<sup>3</sup>.  
200 It might be due to cohesive interaction among neighboring cells together with hydrodynamic  
201 effects among 2D-confined peritrichously flagellated bacteria<sup>25</sup>. The cell-cell interaction may  
202 further result from biochemical change of cell envelope during swarming (e.g., more long  
203 sidechain lipopolysaccharides) or secretions<sup>26</sup>. Once these surrounding matrix or polymers are  
204 washed away by  $\sim 100$ -fold dilution, the cohesive interactions are diminished, resulting in no  
205 dynamic clusters in the dilution experiment and multi-swirl motion pattern under confinement.  
206 Reproducing the experimental results via computer simulation, we confirm that the lower repulsion  
207 and higher alignment are the key factors, which differentiate swimmers and planktonic cells. Future



208 work is called upon to explore further the swarmer rafting phenomenon and to investigate on the  
209 molecular level which category of substances are mainly responsible for the cell-cell cohesive  
210 interaction among the swarming cells.

211 A spectrum of swarming bacteria has the same characteristic as SM3 (Fig. S1A). These bacteria  
212 tested, including SM1, H6, H3, and Db10, all behave like SM3. They all show clustering or  
213 cohesive cell-cell interaction when the swarming colony was diluted and uniformly dispersed  
214 when the concentrated planktonic cells were diluted. One notable exception is *Bacillus subtilis*.  
215 Swarming and concentrated planktonic *Bacillus subtilis* 3610 show the same motion pattern across  
216 different confinement sizes. For well diameter  $d \leq 90 \mu\text{m}$ , both swarming and swimming *B. subtilis*  
217 form single swirls while for well diameter  $d \geq 112 \mu\text{m}$ , they both break into mesoscale vortices. *B.*  
218 *subtilis* is Gram-positive bacteria different from SM3, SM1, H6, H3, and Db10 and we speculate  
219 that swarming *B. subtilis* does not have as strong cell-cell interaction as SM3. The interaction is  
220 not so different between the swarming and planktonic cells since we found the diluted swarming  
221 *B. subtilis* 3610 to disperse uniformly, much like diluted planktonic *B. subtilis* 3610, with no  
222 clustering behavior. The swarming colony thickness might also be a key factor for *B. subtilis* to be  
223 an outlier here. It is known that swarming *B. subtilis* produces abundant surfactant, resulting in a  
224 wide-spread, monolayer, non-compact colony<sup>20,27</sup>. In contrast, swarming SM3 and the other tested  
225 bacteria are multilayer colonies that can be as thick as 20 - 40  $\mu\text{m}$ , which may enhance the spatial  
226 cell-cell alignment that is much stronger than that among the planktonic cells (Fig. S1B).

227 Our observation on SM3 confirms the prediction made by Beppu *et al.* that single vortex occurs  
228 when the confinement diameter  $d$  is smaller than a critical length  $l^*$ <sup>16</sup>. Here, the critical length for  
229 swarming SM3 is  $\sim 49 \mu\text{m}$ , whereas, for concentrated planktonic SM3, it is  $\sim 17 \mu\text{m}$ . Interestingly,  
230 the same bacteria strain in different motility states has two distinct critical lengths. Thus, we were  
231 able to use this property to identify the motility types on mouse mucosal surfaces. The beads  
232 motion is not a perfect swirl in every well on the colitic tissue because the mucosal surface is not  
233 as smooth as the agar surface. There are sags and crests on the inflamed mucosal surface due to  
234 the disrupted mucin layer. We conjectured that this unevenness would hinder the swirl formation  
235 to a certain extent and intact swirl patterns can be spotted only on limited locations where the  
236 mucosal surface is relatively flat. Nevertheless, capturing only a few wells where beads show  
237 single swirl motion suffices to show that swarming can happen on the mucosal surface.

238 Evidence of genetic up/down regulations<sup>28-31</sup> and cell morphology changes (e.g., cell elongation  
239 and hyper-flagellation) indicates that swarming is a different phenotype from swimming. Lacking  
240 comparison under the same conditions of experiments, one might suspect that bacterial swarming  
241 might just be a dense group of cells swimming on a surface<sup>3</sup>. Here, through geometry confinement,  
242 we show *Enterobacter* sp. SM3 as an example that swarming manifests different biophysical  
243 characteristics from swimming. The key experimental method used in this study differentiates  
244 swarming motility from swimming motility and provides a straightforward assay to detect  
245 swarming behavior on a given surface visually. The findings of this study provide the rationale for  
246 developing applications such as isolating bacterial swimmers from a polymicrobial environment  
247 and developing diagnostics for the presence of *in vivo* swarming. A quantitative ranking system  
248 for different swimmers could potentially be established based on characteristic well size that  
249 stabilizes the confined motion pattern into a single swirl. Such a ranking system will be significant  
250 for future investigations on the implications of swarming bacteria on host health and diseases.

## 251 **Methods**

252 **PDMS confinement sheet fabrication.** Polydimethylsiloxane (PDMS) microwell confinement  
253 sheets with different combinations of well sizes and depths were fabricated using the technique of  
254 soft photolithography. Patterns of the confinement were first designed using the software “L-Edit”  
255 and then uploaded into a maskless aligner (MLA 150, Heidelberg). On a 3.5-inch silicon wafer  
256 (University Wafer Inc.), photoresist gel SQ25 (KemLab, Inc.) was spin-coated at 2,000 rpm (spin  
257 speed varies according to the desired coating thickness). After baking, UV exposure, and chemical  
258 development, the microwells’ designed pattern was shown on the wafer (moulding). Then, PDMS  
259 (Dow Corning Sylgard 184) base elastomer was mixed with the curing agent at the ratio of 10:1 in  
260 weight. The mixture was cast onto the patterned silicon wafer. Two grams of the mixture ended  
261 up with a PDMS sheet about 0.5 mm thick. The PDMS solidified at room temperature within 48  
262 hours and it was cut into pieces and peeled off from the silicon wafer before use (demoulding).

263 **Bacterial growth and confinement (Fig. 6A).** *Enterobacter* sp. SM3 is a novel swarming  
264 bacterial strain isolated from inflammatory mice<sup>10</sup>. SM3 was transferred from - 80°C glycerol stock  
265 to fresh LB (Lysogeny Broth: water solution with 10 g/L tryptone, 5 g/L yeast, and 5 g/L NaCl)  
266 and shaken overnight (~ 16 h) in a 37°C incubator at 200 rpm. For swarming under confinement

267 assay (Fig. 6A, red arrows), 2  $\mu\text{L}$  overnight bacterial culture was inoculated on the center of a LB  
268 agar plate (10 g/L tryptone, 5 g/L yeast, 5 g/L NaCl, and 5 g/L Agar; volume = 20 mL/plate) and  
269 kept in a 37°C incubator. After 2.5 h of swarming, a PDMS chip ( $\sim 1 \text{ cm}^2$ ) was mounted upon the  
270 edge of the swarming colony and the Petri dish was transferred onto the microscope stage for  
271 observation. For swimming under confinement assay (Fig. 6A, blue arrows), overnight bacterial  
272 culture was resuspended in fresh LB (1:100 in volume) and shaken in the 37°C incubator at 200  
273 rpm for 2.5 h. The freshly grown culture was centrifuged at 1,500 g for 10 min and  $\sim 98.6\%$  of the  
274 supernatant was removed so that the resultant cell density is about 70 times the fresh grown culture.  
275 Ten (10)  $\mu\text{L}$  concentrated bacteria culture was inoculated on the LB agar plate, and PDMS chip  
276 was mounted immediately. The plate was then transferred onto the microscope stage for  
277 observation. For other strains of bacteria, including *Bacillus Subtilis* 3610, the procedure was the  
278 same as that of SM3. On one PDMS chip, there are thousands of wells and when mounted on a  
279 bacteria spot or colony edge, hundreds of them are occupied by bacteria. The PDMS chip was first  
280 brought to contact with the bacteria and then gently mounted onto the agar. In this case, there was  
281 a cell density gradient across an array of wells, with the wells closer to the bacteria spot or colony  
282 center having relatively higher cell density. In the experiment, we focused on the area where the  
283 confined bacteria showed collective motion, i.e. the cell density was not too high to jam the well  
284 or too low so that each cell was moving independently.

285 **Bacterial cell density measurement (Fig. 6B).** 2.5 h freshly grown SM3 was subjected to  
286 different factors of dilution in LB, such as  $10^2$ ,  $10^3$ , until  $10^8$ . 50  $\mu\text{L}$  of each diluted culture was  
287 inoculated and spread on 1.5 % LB agar plate (10 g/L tryptone, 5 g/L yeast, 5 g/L NaCl, and 15  
288 g/L Agar; volume = 20 mL/plate) and was incubated at 37°C for 16 h. Bacterial colonies appeared  
289 on the agar plates and the number of colonies was counted for the dilution that resulted in the  
290 colony's number on the order of 100. The colony forming unit per microliter (CFU/mL) was  
291 calculated by dividing the colony number by the sampled volume. For swarming SM3, the cell  
292 density was measured in a similar way. On the edge of the swarming colony, a chunk of swarming  
293 SM3 ( $\sim 1 \text{ mm}$  wide) was picked by an eight (8) mm-wide square spatulate containing a small piece  
294 of agar on the bottom to ensure all the cells in that region were sampled. The 1 mm x 8 mm chunk  
295 of swarming SM3 was then mixed into 1 mL LB for CFU determination. The colony thickness  
296 was assumed to be uniform across the sample and was measured by microscopy focusing on the  
297 top of the colony and the top of the agar surface (i.e., at the bottom of the colony), keeping track

298 of the readings on the fine adjustment knob. Particles of baby powder (~ several micrometers in  
299 diameter) were spread on the surfaces of the swarm colony and the agar to aid in the microscope  
300 focus. The thickness of the swarming colony was calculated based on the calibration of the knob  
301 turning tick readings. Then the cell density was estimated by CFU/mL. CFU was calculated for  
302 both swarming and swimming SM3 to make sure the cell densities of these two cases were  
303 comparable inside the wells. We consider colony forming unit counting a better way to control the  
304 live cell number than simply using the volume fraction because: 1, Dead cells that count in the  
305 volume fraction will not contribute to the motion in the well, but they will be excluded in CFU  
306 calculation; 2, It is technically difficult to measure the volume of dense bacterial suspension using  
307 pipetting method due to high viscosity.

308 **Bacterial cell length and motility.** For swimming SM3, 2.5 h freshly grown culture was diluted  
309 100 times in LB and 50  $\mu$ L of which was transferred on a glass slide and covered with a coverslip.  
310 The sample slide was placed under the microscope (Olympus CKX41, 20X) and image sequences  
311 were captured. Cell lengths were measured using ImageJ (v1.59e) freehand label tool. Cell speed  
312 was calculated by traveling trajectory length divided by the traveling duration (~ 1s). For swarming  
313 SM3, a chunk of swarming bacteria was collected from the edge of the swarming colony and mixed  
314 with 1 mL LB. A droplet of 50  $\mu$ L mixed culture was sandwiched by a glass slide and a cover slip,  
315 and the rest of the procedure was the same as that for the swimming SM3.

316 **Swimming SM3 with different treatments. i), Cephalixin treatment.** Overnight SM3 culture  
317 was diluted 100 times in fresh LB and incubated in a 37°C shaker at 200 rpm for 1.5 h. Cephalixin  
318 (CEP) was added to the culture so that the resultant concentration of CEP was 60  $\mu$ g/mL. The  
319 culture was kept in the shaker for another two (2) h before use. **ii), Surfactin additions.** After 2.5  
320 h regrown culture was centrifuged, more supernatant was removed than usual, and surfactin was  
321 added so that the resulting concentrations of surfactin were 10, 50, 100, 500  $\mu$ M while the cell  
322 density remained comparable to that of swarming SM3. **iii), Addition of swarming supernatant.**  
323 Before swarming SM3 covered the plate, the colony was scratched carefully using a piece of  
324 PDMS (~ 0.5 cm<sup>2</sup>) and transferred into 1 mL deionized water. The mixture was sucked into a  
325 syringe and filtered with a 0.2  $\mu$ m filter. Then the solution was lyophilized to powder and then  
326 dissolved into the concentrated swimming SM3 of roughly the same volume as the collected

327 swarm fluid. Thus, the concentration of the swarming supernatant was kept the same after being  
328 transferred to swimming SM3.

329 **Swarming SM3 with different treatments. i), Rubbed with PDMS.** After SM3 swarmed on the  
330 agar plate for 2.5 h, a piece of PDMS (~ 0.5 cm<sup>2</sup>) was used to rub gently on the edge of the  
331 swarming colony so that the swarming cells were disturbed. A PDMS confinement chip was then  
332 mounted on the disturbed region for observation. **ii), Spun down in LB.** After swarming for 2.5  
333 h, SM3 cells were collected from the edge of the colony using the blotting method<sup>32</sup>. The cells  
334 were blotted by a piece of spare PDMS and transferred to 1 mL LB. The swarming cells were  
335 centrifuged at 1,500g, and LB was removed in order to restore the initially high cell density. Ten  
336 (10) µL of the swarming cells thus treated were inoculated on a new swarm agar and a PDMS  
337 confinement chip was mounted for observation. **iii), Added D-mannose.** A droplet of 50 µL 0.2%  
338 (w/v) D-mannose was pipetted on a swarming SM3 colony edge. After 1-2 minutes, when the cell  
339 density became uniform again, a piece of PDMS confinement chip was applied to the D-mannose  
340 treated region for observation under the microscope.

341 **VOP measurement and spatial autocorrelation function.** Image sequences of swarming or  
342 swimming SM3 under confinement were taken by a microscope camera (ThorLabs, Kiralux  
343 CS505MU) and then processed using a particle image velocimetry (PIV) package in MATLAB.  
344 The velocity field was marked for the confined bacteria and the VOP was calculated using the  
345 equation in Fig. 1E. Using the velocity field information, the spatial autocorrelation function was  
346 calculated through the equation  $C_r(\Delta r) = \langle \frac{v(r_0) \cdot v(r_0 + \Delta r)}{|v(r_0)|^2} \rangle$ , where  $r_0$  is the local position vector  
347 and  $\Delta r$  is the displacement vector<sup>33</sup>. A Python script was written to calculate all the  $C_r$  values in  
348 the region of interest (ROI) with a label of  $\Delta r$  values. These  $C_r$  values were then plotted as a  
349 function of  $\Delta r$ .

350 **Clustering analysis.** On the swarming SM3 colony edge or concentrated swimming SM3  
351 inoculation, a droplet of 50 µL deionized water was added via a pipette. Once the fluid flow  
352 stabilizes, image sequences were captured at the locations of the diluted swarming or swimming  
353 SM3 samples. In a region of 130 µm x 130 µm, using the PIV toolkit, the velocity field was  
354 calculated and the vectors with magnitude below four (4) µm/s were removed. The purpose of the  
355 vector validation was to exclude non-motile bacteria. Once the moving cells were identified, a

356 Python script was implemented to perform the clustering analysis using the function of DBSCAN<sup>34</sup>  
357 where the parameter  $\epsilon$  was set to 50, which specifies how close points should be to each other to  
358 be considered a part of a cluster, and the minimum number of points to form a cluster was set to  
359 20.

360 **Numerical Simulations.** The numerical simulation consists of a 2D system of  $N$  particles. The  
361 position  $\mathbf{r}$  of each particle is modeled via the following overdamped Langevin equation:

$$362 \quad \partial_t \mathbf{r}_i = v_0 \hat{p}_i - \sum_{j \neq i} G_\theta(d_{ex}, r_{ji}) + \sqrt{2D_T} \xi_i \quad (1)$$

363 It is assumed that particles are cruising at a constant speed of  $v_0$  in the direction of  $\hat{p}_i =$   
364  $[\cos(\theta_i), \sin(\theta_i)]$ . The second term includes the exclusion forcing term from all neighboring  
365 particles residing at a distance  $r_{ji}$  closer than the exclusion range  $d_{ex}$ . The last term is the thermal  
366 fluctuation term with the translational diffusivity of  $D_T$  and a zero-mean and delta-correlated noise  
367 term  $\xi$ . The direction of motion  $\theta_i$  of each particle is updated by the interaction terms  $F_\theta$  which  
368 includes alignment, anti-alignment and repulsion effects with all neighboring particles and also the  
369 rotational diffusion term with diffusivity of  $D_r$  and noise term  $\zeta$ :

$$370 \quad \partial_t \theta_i = \sum_{j \neq i} F_\theta(\mathbf{r}_{ji}, \hat{p}_i, \hat{p}_j) + \sqrt{2D_r} \zeta_i \quad (2)$$

371 The details of the binary interaction terms  $G_\theta$  and  $F_\theta$  are provided in the Supplementary Material.  
372 The simulation starts with random initial position and orientations, followed by numerical  
373 integration of equations (1) and (2) using a first-order Euler method. The integration time step  $\Delta t$   
374 is chosen small enough to ensure numerical stability and also independence of long-term dynamics  
375 from the time step increment. The interaction of particles with circular bounded domain is modeled  
376 through a reflective boundary condition, where the particles are reflected off the boundary with an  
377 angle equal to their incident angle. In all diluted cases, reflecting solid boundary is replaced with  
378 a periodic boundary condition to ensure that boundary scattering is not affecting the dynamics in  
379 the bulk.

380 **Figure 1**

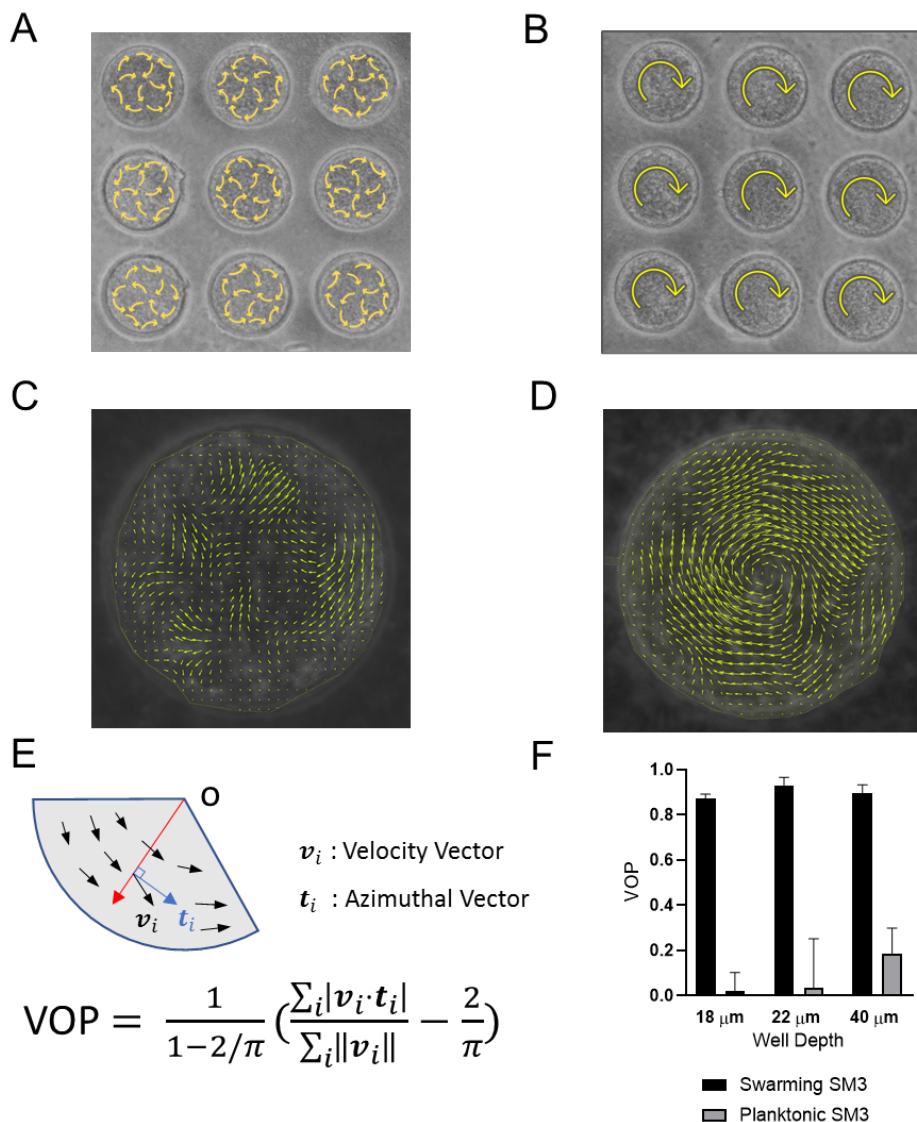

381  
 382 **Figure 1 | Swirls of *Enterobacter* sp. SM3 under circular confinement.** (A-B) Motion pattern of  
 383 concentrated planktonic (A) and swarming (B) SM3 in the PDMS microwells of 74 μm in diameter. Circular  
 384 arrows indicate the direction of bacterial collective motion. (C-D) Velocity field of concentrated planktonic  
 385 (C) and swarming (D) SM3 in a single microwell. (E) Illustration of how vortex order parameter (VOP) is  
 386 defined.  $|\cdot|$  denotes the absolute value while  $\|\cdot\|$  denotes the Euclidean norm. (F) VOP of swarming and  
 387 swimming SM3 in 74 μm microwells of different depths. The sample size  $n = 5$  for each group and data are  
 388 represented as mean and standard deviation (+SD).

389 **Figure 2**  
 390

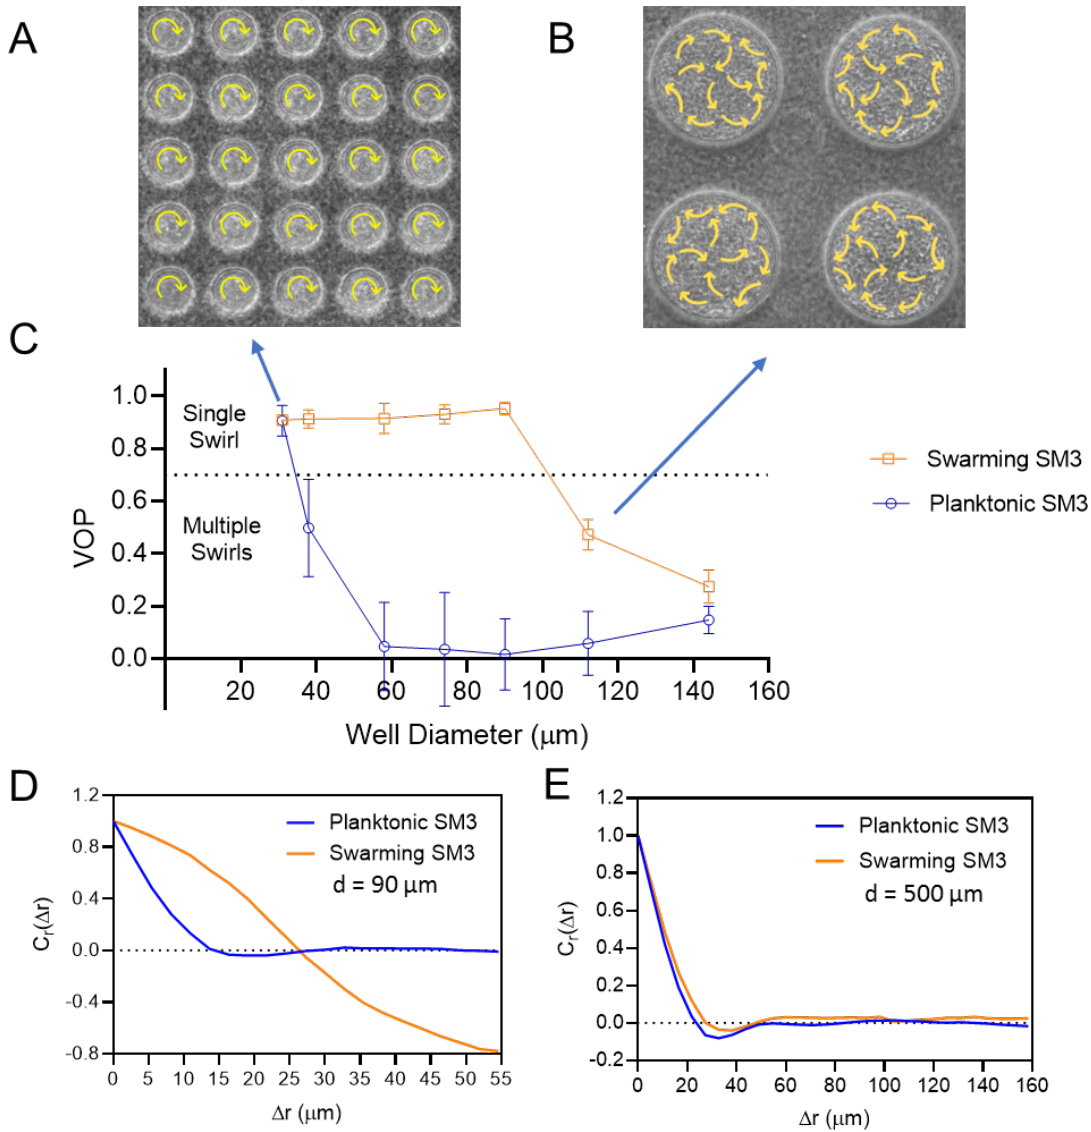

391  
 392 **Figure 2 | The effect of well diameter on confined *Enterobacter Sp.* SM3 motility patterns. (A-B)**  
 393 Motion pattern of concentrated planktonic SM3 confined in 31 μm (A) and swarming SM3 confined in 112  
 394 μm (B) diameter microwells. (C) VOP of swarming and concentrated planktonic SM3 as a function of well  
 395 diameter. The error bars represent the standard deviations ( $\pm$  SD) for each data point, and the sample size  
 396 is  $n = 5$ . (D-E) Spatial autocorrelations of the bacterial velocity field in the well diameter of 90 μm (D) and  
 397 500 μm (E). Unless otherwise noted, the depth of the wells is 22 μm.



398 **Figure 3**

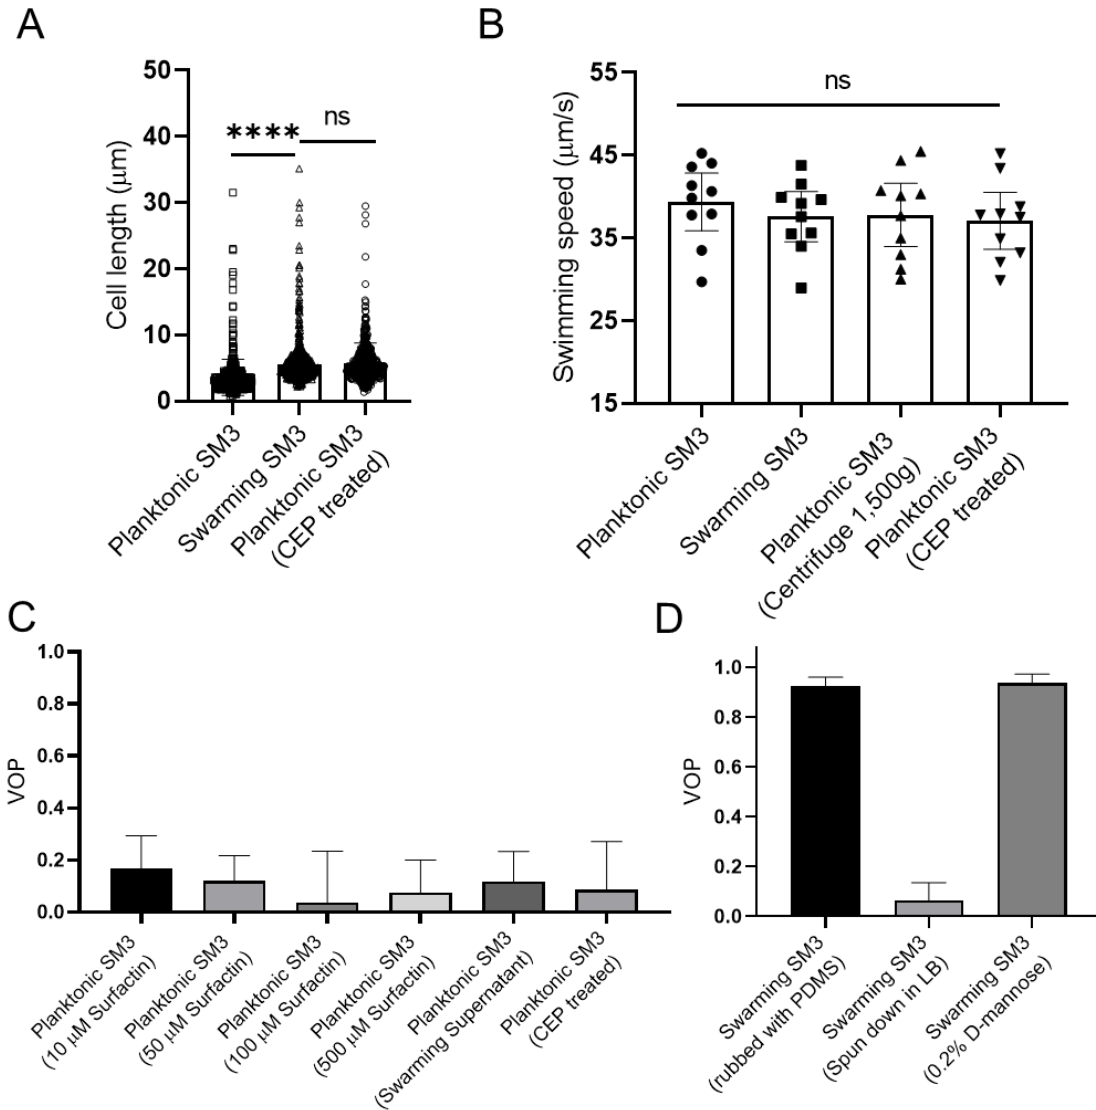

399

400 **Figure 3 | Factors that possibly influence the bacterial motion pattern in the well.** (A) Bacterial cell  
 401 length of planktonic, swarming, and Cephalexin (CEP) treated planktonic SM3,  $n = 500$  for each group.  
 402 Data are represented as median and interquartile range. \*\*\*\* indicates  $P < 0.0001$ . ns indicates not  
 403 significant (Kruskal-Wallis test). (B) Bacterial cell speed of swimming, swarming, centrifuged, and CEP  
 404 treated swimming SM3,  $n = 10$  for each group. ns, not significant, one-way ANOVA followed by Tukey's  
 405 post hoc test. (C) VOP of swimming SM3 under  $74 \mu\text{m}$  diameter confinement with different treatments,  $n$   
 406  $= 5$  for each group. (D) VOP of swarming SM3 under  $74 \mu\text{m}$  diameter confinement with different treatments,  
 407  $n = 5$  for each group. B-D, Data are represented as mean and standard deviation (+SD).

408 **Figure 4**

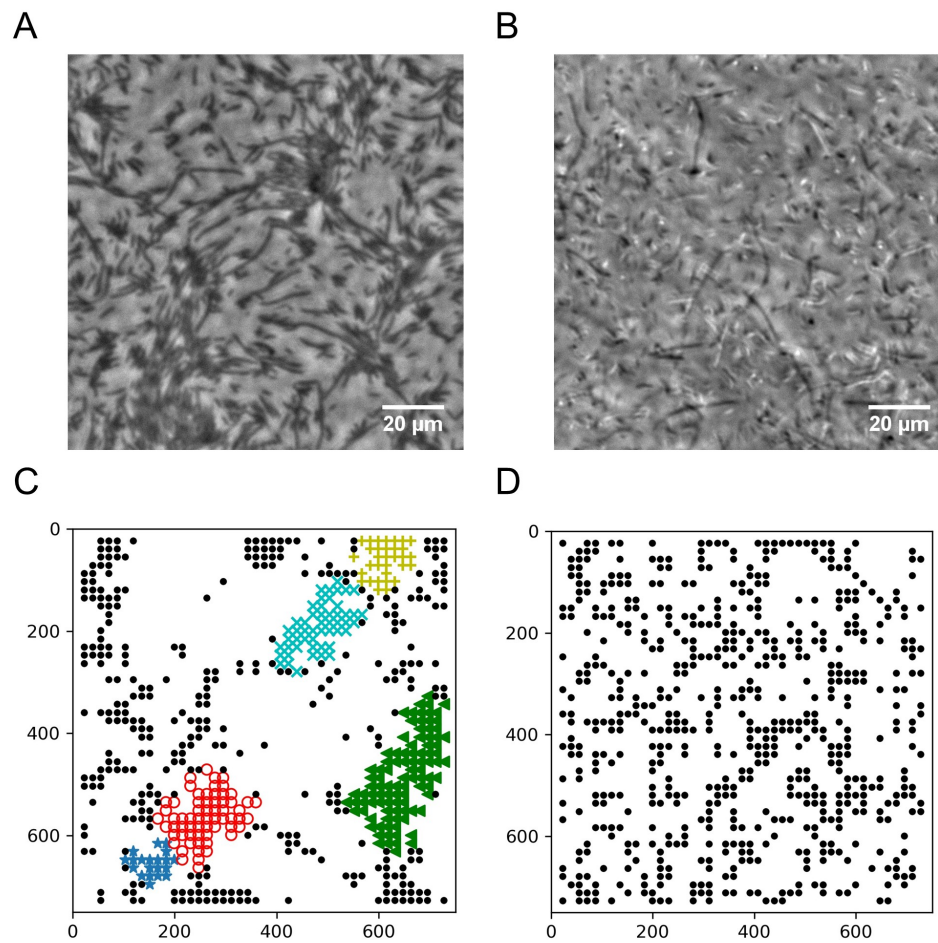

409

410 **Figure 4 | Spatial distribution of swarming and swimming SM3 cells.** (A-B) Snapshots showing diluted  
411 swarming SM3 (A) and swimming SM3 (B) on a soft agar surface, respectively. (C-D) DBSCAN clustering  
412 analysis of diluted swarming SM3 (C) and swimming SM3 (D). Black dots represent moving bacterial cells  
413 and colored markers show cells in clusters, as determined by the program. The axis represents the dimension  
414 of the image in pixels.

415 **Figure 5**

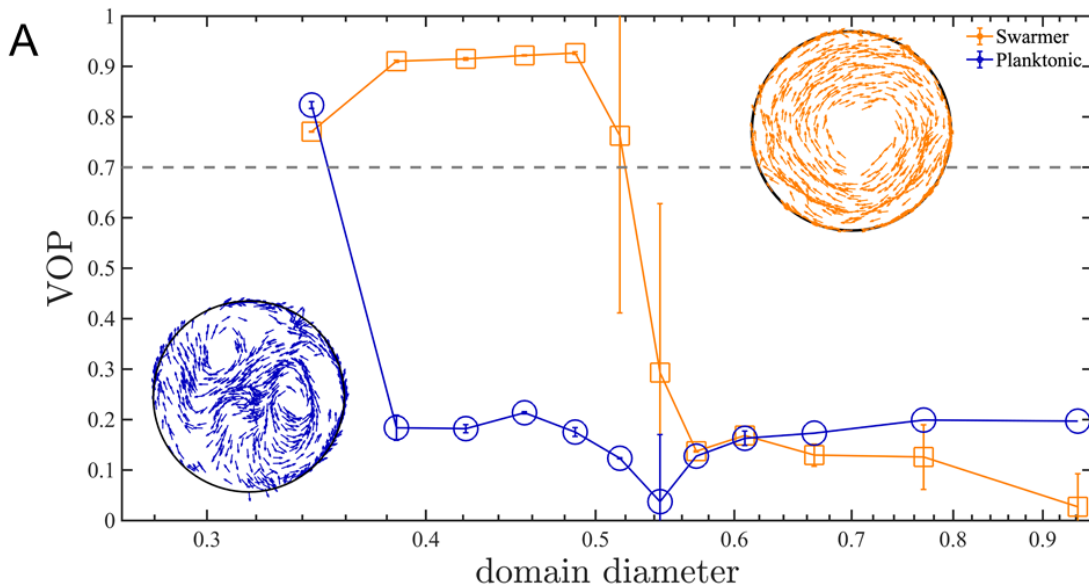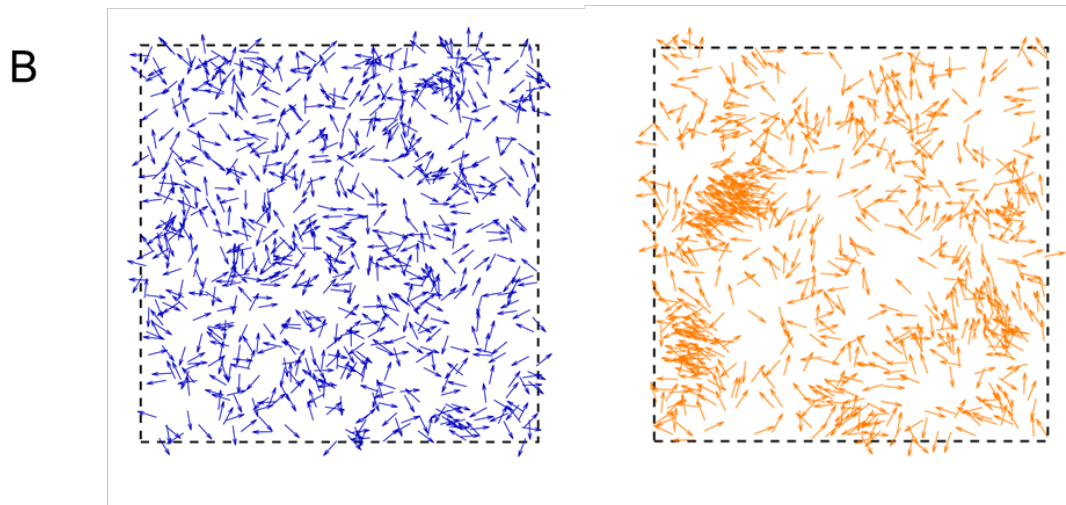

416

417 **Figure 5 | Numerical simulations of planktonic and swarming SM3 in confinement and open space.**

418 (A) VOP of swarming and concentrated planktonic SM3 as a function of well diameter. The error bars

419 represent the standard deviations ( $\pm$  SD) for each data point, and the sample size is  $n = 5$ . The circles on the

420 upper right corner and the lower left corner show representative motion patterns of swimmers and

421 concentrated planktonic cells in the confinement size between 0.38 and 0.5. (B) Planktonic cells (left) and

422 diluted swarming cells (right) with same cell density in a space of periodic boundary condition.

423

424 **Figure 6**

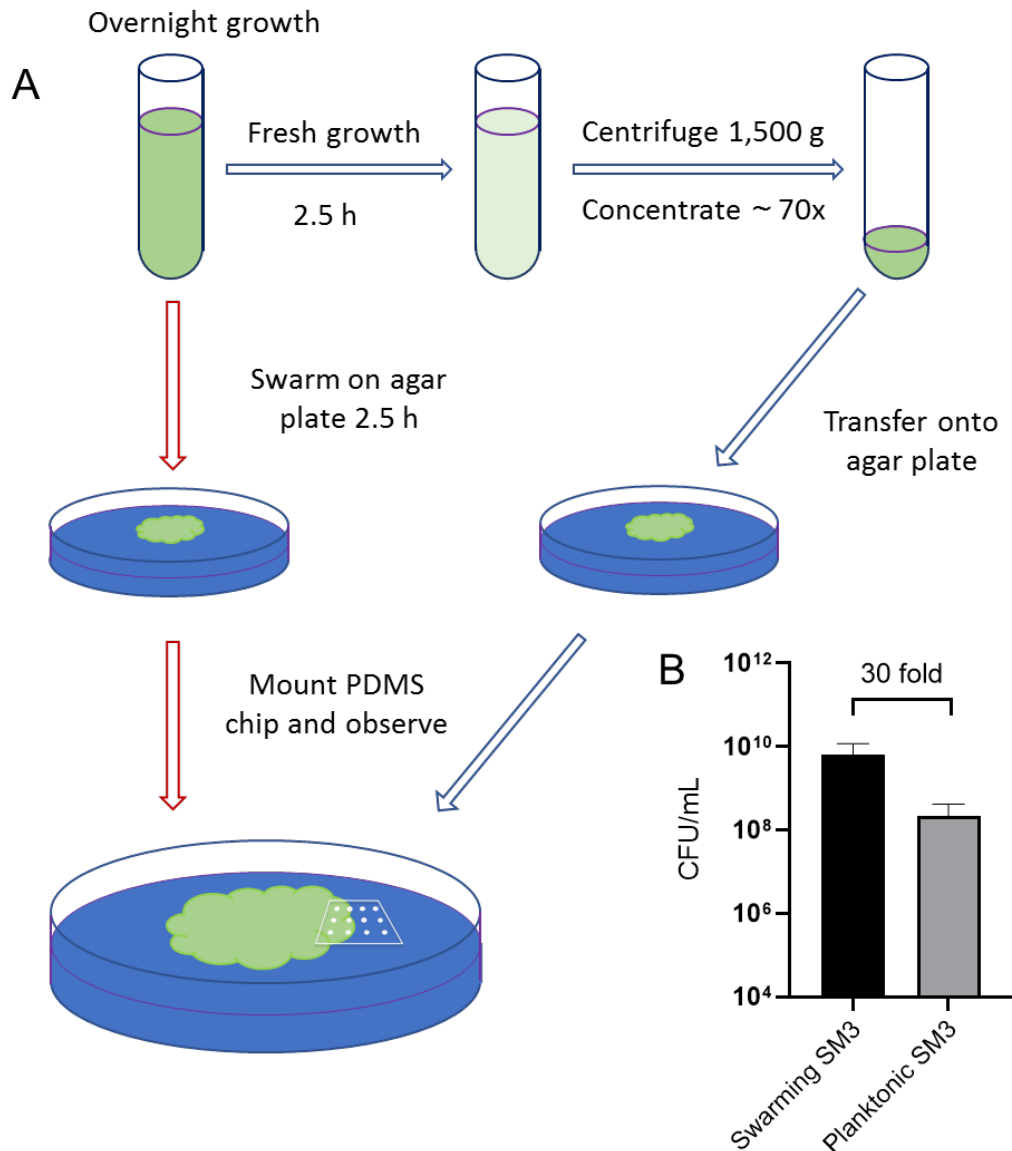

425  
426 **Figure 6 | Illustration of experimental procedure.** (A) Schematic of sample preparation procedure. Red  
427 arrows represent the assay procedure for swarming bacteria. Blue arrows represent the assay procedure for  
428 swimming planktonic bacteria. (B) Cell density measured by colony forming unit (CFU/mL) of swarming  
429 SM3 and swimming SM3. Swarming SM3 cell density is measured after SM3 swarming on an agar surface  
430 for 2.5 h while swimming SM3 cell density is measured for overnight SM3 culture being regrown in fresh  
431 Lysogeny Broth (LB) for 2.5 h. Since cell density of swarming SM3 was higher than that of planktonic  
432 SM3, the latter was concentrated before being applied on the agar plate to acquire comparable cell density.

## 433 References

- 434 1 Webre, D. J., Wolanin, P. M. & Stock, J. B. Bacterial chemotaxis. *Curr Biol* **13**, R47-R49, doi:Doi  
435 10.1016/S0960-9822(02)01424-0 (2003).
- 436 2 Josenhans, C. & Suerbaum, S. The role of motility as a virulence factor in bacteria. *Int J Med*  
437 *Microbiol* **291**, 605-614, doi:Doi 10.1078/1438-4221-00173 (2002).
- 438 3 Kearns, D. B. A field guide to bacterial swarming motility. *Nat Rev Microbiol* **8**, 634-644,  
439 doi:10.1038/nrmicro2405 (2010).
- 440 4 Partridge, J. D. & Harshey, R. M. Swarming: Flexible Roaming Plans. *J Bacteriol* **195**, 909-918,  
441 doi:10.1128/Jb.02063-12 (2013).
- 442 5 Darnton, N. C., Turner, L., Rojevsky, S. & Berg, H. C. Dynamics of Bacterial Swarming. *Biophys*  
443 *J* **98**, 2082-2090, doi:10.1016/j.bpj.2010.01.053 (2010).
- 444 6 Michaels, B. & Tisa, L. S. Swarming motility by *Photobacterium aeruginosa* is influenced by  
445 environmental conditions and uses the same flagella as that used in swimming motility. *Can J*  
446 *Microbiol* **57**, 196-203, doi:10.1139/W10-119 (2011).
- 447 7 Hall, A. N., Subramanian, S., Oshiro, R. T., Canzoneri, A. K. & Kearns, D. B. SwrD (Ylzl)  
448 Promotes Swarming in *Bacillus subtilis* by Increasing Power to Flagellar Motors. *J Bacteriol* **200**,  
449 doi:UNSP e0052910.1128/JB.00529-17 (2018).
- 450 8 Partridge, J. D., Nhu, N. T. Q., Dufour, Y. S. & Harshey, R. M. *Escherichia coli* Remodels the  
451 Chemotaxis Pathway for Swarming. *Mbio* **10**, doi:ARTN e00316-1910.1128/mBio.00316-19  
452 (2019).
- 453 9 Overhage, J., Bains, M., Brazas, M. D. & Hancock, R. E. W. Swarming of *Pseudomonas aeruginosa*  
454 is a complex adaptation leading to increased production of virulence factors and antibiotic  
455 resistance. *J Bacteriol* **190**, 2671-2679, doi:10.1128/Jb.01659-07 (2008).
- 456 10 Chen, W. *et al.* Bacterial Swimmers exhibit a Protective Response to Intestinal Stress,  
457 <<https://www.biorxiv.org/content/10.1101/759886v3>> (2020).
- 458 11 Wioland, H., Lushi, E. & Goldstein, R. E. Directed collective motion of bacteria under channel  
459 confinement. *New J Phys* **18**, doi:Artn 07500210.1088/1367-2630/18/7/075002 (2016).
- 460 12 Wioland, H., Woodhouse, F. G., Dunkel, J. & Goldstein, R. E. Ferromagnetic and  
461 antiferromagnetic order in bacterial vortex lattices. *Nat Phys* **12**, 341-U177,  
462 doi:10.1038/Nphys3607 (2016).
- 463 13 Theillard, M., Alonso-Matilla, R. & Saintillan, D. Geometric control of active collective motion.  
464 *Soft Matter* **13**, 363-375, doi:10.1039/c6sm01955b (2017).
- 465 14 Wioland, H., Woodhouse, F. G., Dunkel, J., Kessler, J. O. & Goldstein, R. E. Confinement  
466 Stabilizes a Bacterial Suspension into a Spiral Vortex. *Phys Rev Lett* **110**, doi:ARTN  
467 26810210.1103/PhysRevLett.110.268102 (2013).
- 468 15 Lushi, E., Wioland, H. & Goldstein, R. E. Fluid flows created by swimming bacteria drive self-  
469 organization in confined suspensions. *P Natl Acad Sci USA* **111**, 9733-9738,  
470 doi:10.1073/pnas.1405698111 (2014).
- 471 16 Beppu, K. *et al.* Geometry-driven collective ordering of bacterial vortices. *Soft Matter* **13**, 5038-  
472 5043, doi:10.1039/c7sm00999b (2017).
- 473 17 Araujo, G., Chen, W. J., Mani, S. & Tang, J. X. Orbiting of Flagellated Bacteria within a Thin Fluid  
474 Film around Micrometer-Sized Particles. *Biophys J* **117**, 346-354, doi:10.1016/j.bpj.2019.06.005  
475 (2019).

- 476 18 Doostmohammadi, A., Adamer, M. F., Thampi, S. P. & Yeomans, J. M. Stabilization of active  
477 matter by flow-vortex lattices and defect ordering. *Nat Commun* **7**, doi:ARTN  
478 1055710.1038/ncomms10557 (2016).
- 479 19 Hamby, A. E., Vig, D. K., Safonova, S. & Wolgemuth, C. W. Swimming bacteria power microspin  
480 cycles. *Sci Adv* **4**, doi:ARTN eaau012510.1126/sciadv.aau0125 (2018).
- 481 20 Be'er, A. & Ariel, G. A statistical physics view of swarming bacteria. *Mov Ecol* **7**, doi:ARTN  
482 910.1186/s40462-019-0153-9 (2019).
- 483 21 Grossmann, R., Romanczuk, P., Bar, M. & Schimansky-Geier, L. Pattern formation in active  
484 particle systems due to competing alignment interactions. *The European Physical Journal*, 1325-  
485 1347, doi:10.1140/epjst/e2015-02462-3 (2015).
- 486 22 Grossmann, R., Romanczuk, P., Bar, M. & Schimansky-Geier, L. Vortex arrays and mesoscale  
487 turbulence of self-propelled particles. *Phys Rev Lett* **113**, 258104,  
488 doi:10.1103/PhysRevLett.113.258104 (2014).
- 489 23 Turner, L., Zhang, R. J., Darnton, N. C. & Berg, H. C. Visualization of Flagella during Bacterial  
490 Swarming. *J Bacteriol* **192**, 3259-3267, doi:10.1128/Jb.00083-10 (2010).
- 491 24 Tsang, A. C. H. & Kanso, E. Circularly confined microswimmers exhibit multiple global patterns.  
492 *Phys Rev E* **91**, doi:ARTN 04300810.1103/PhysRevE.91.043008 (2015).
- 493 25 Li, Y., Zhai, H., Sanchez, S., Kearns, D. B. & Wu, Y. L. Noncontact Cohesive Swimming of  
494 Bacteria in Two-Dimensional Liquid Films. *Phys Rev Lett* **119**, doi:ARTN  
495 01810110.1103/PhysRevLett.119.018101 (2017).
- 496 26 Judith P. Armitage, D. G. S., R. J. Rowbury. Alternation in the cell envelope composition of  
497 *Proteus Mirabilis* during the development of swarmer cells. *Biochimica et Biophysica Acta* **584**,  
498 389-397 (1979).
- 499 27 Jeckel, H. *et al.* Learning the space-time phase diagram of bacterial swarm expansion. *P Natl Acad*  
500 *Sci USA* **116**, 1489-1494, doi:10.1073/pnas.1811722116 (2019).
- 501 28 Tremblay, J. & Deziel, E. Gene expression in *Pseudomonas aeruginosa* swarming motility. *Bmc*  
502 *Genomics* **11**, doi:ArtN 58710.1186/1471-2164-11-587 (2010).
- 503 29 Wang, Q. F., Frye, J. G., McClelland, M. & Harshey, R. M. Gene expression patterns during  
504 swarming in *Salmonella typhimurium*: genes specific to surface growth and putative new motility  
505 and pathogenicity genes. *Mol Microbiol* **52**, 169-187, doi:10.1111/j.1365-2958.2003.03977.x  
506 (2004).
- 507 30 Morgenstein, R. M., Szostek, B. & Rather, P. N. Regulation of gene expression during swarmer  
508 cell differentiation in *Proteus mirabilis*. *Fems Microbiol Rev* **34**, 753-763, doi:10.1111/j.1574-  
509 6976.2010.00229.x (2010).
- 510 31 Daniels, R., Vanderleyden, J. & Michiels, J. Quorum sensing and swarming migration in bacteria.  
511 *Fems Microbiol Rev* **28**, 261-289, doi:10.1016/j.femsre.2003.09.004 (2004).
- 512 32 Darnton, N., Turner, L., Breuer, K. & Berg, H. C. Moving fluid with bacterial carpets. *Biophys J*  
513 **86**, 1863-1870, doi:Doi 10.1016/S0006-3495(04)74253-8 (2004).
- 514 33 Patteson, A. E., Gopinath, A. & Arratia, P. E. The propagation of active-passive interfaces in  
515 bacterial swarms. *Nat Commun* **9**, doi:ARTN 537310.1038/s41467-018-07781-y (2018).
- 516 34 Ester, M. K., H. Sander, J. Xu, X. in *Proceedings of the Second International Conference on*  
517 *Knowledge Discovery and Data Mining*. 226-231 (AAAI Press).
- 518

519 **Supplementary Information**

520 **Figure S1**

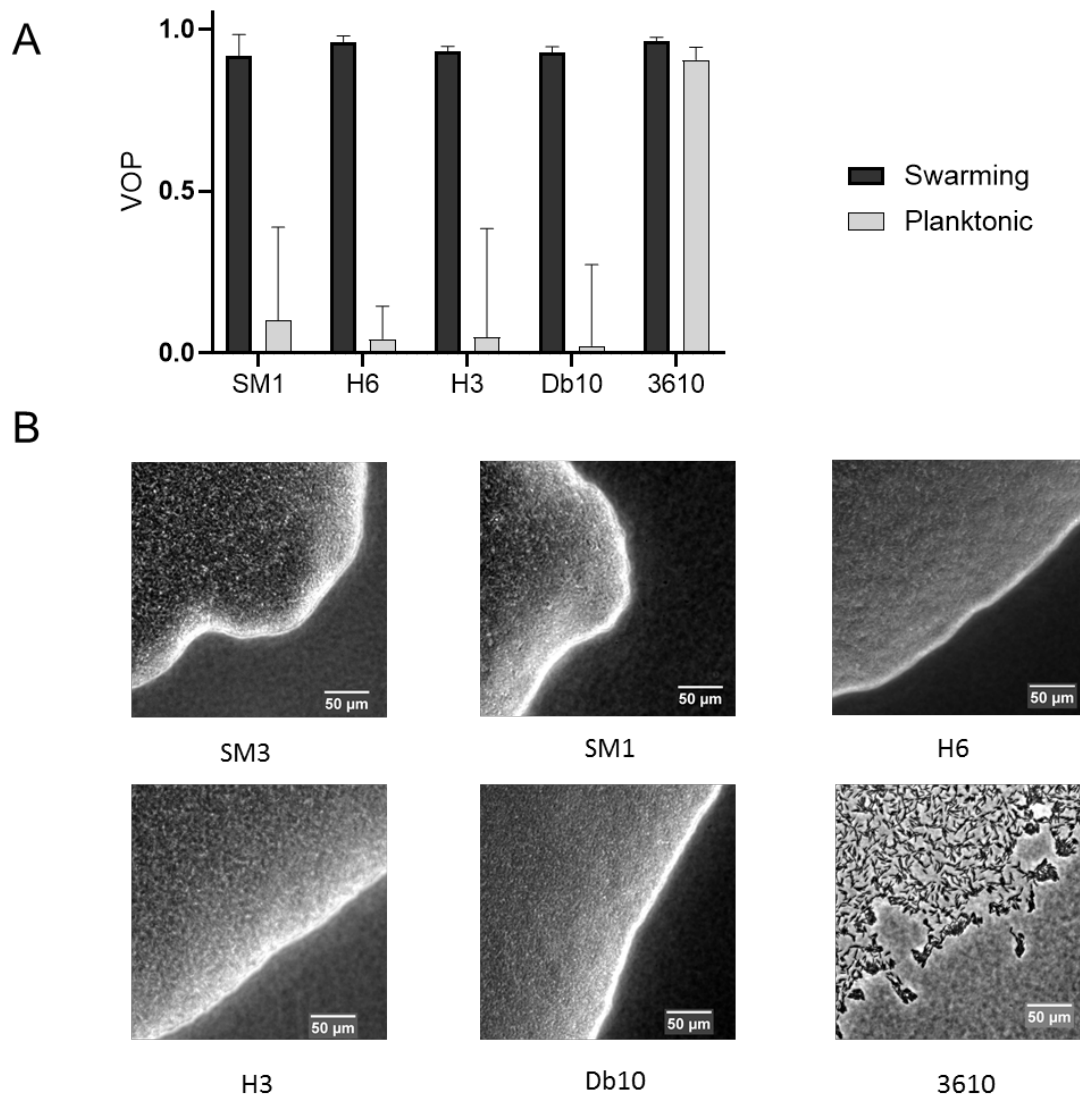

521

522

523 **Figure S1 | Other bacteria under confinement and their swarm front.** (A) VOP of concentrated  
524 planktonic and swarming *Enterobacter* sp. SM1, *Citrobacter koseri* (H6), *Serratia marcescens* (H3),  
525 *Serratia marcescens* (Db10) and *Bacillus subtilis* 3610 confined in the PDMS microwells of 58  $\mu$ m in  
526 diameter. The bars indicate averages with standard deviation (+SD) over 5 microwells. (B) Swarm front of  
527 the tested bacteria. *B. subtilis* 3610 shows monolayer, loose swarming colony while all the other bacteria  
528 strains show multilayer, compact swarming colony.

529 **Figure S2**

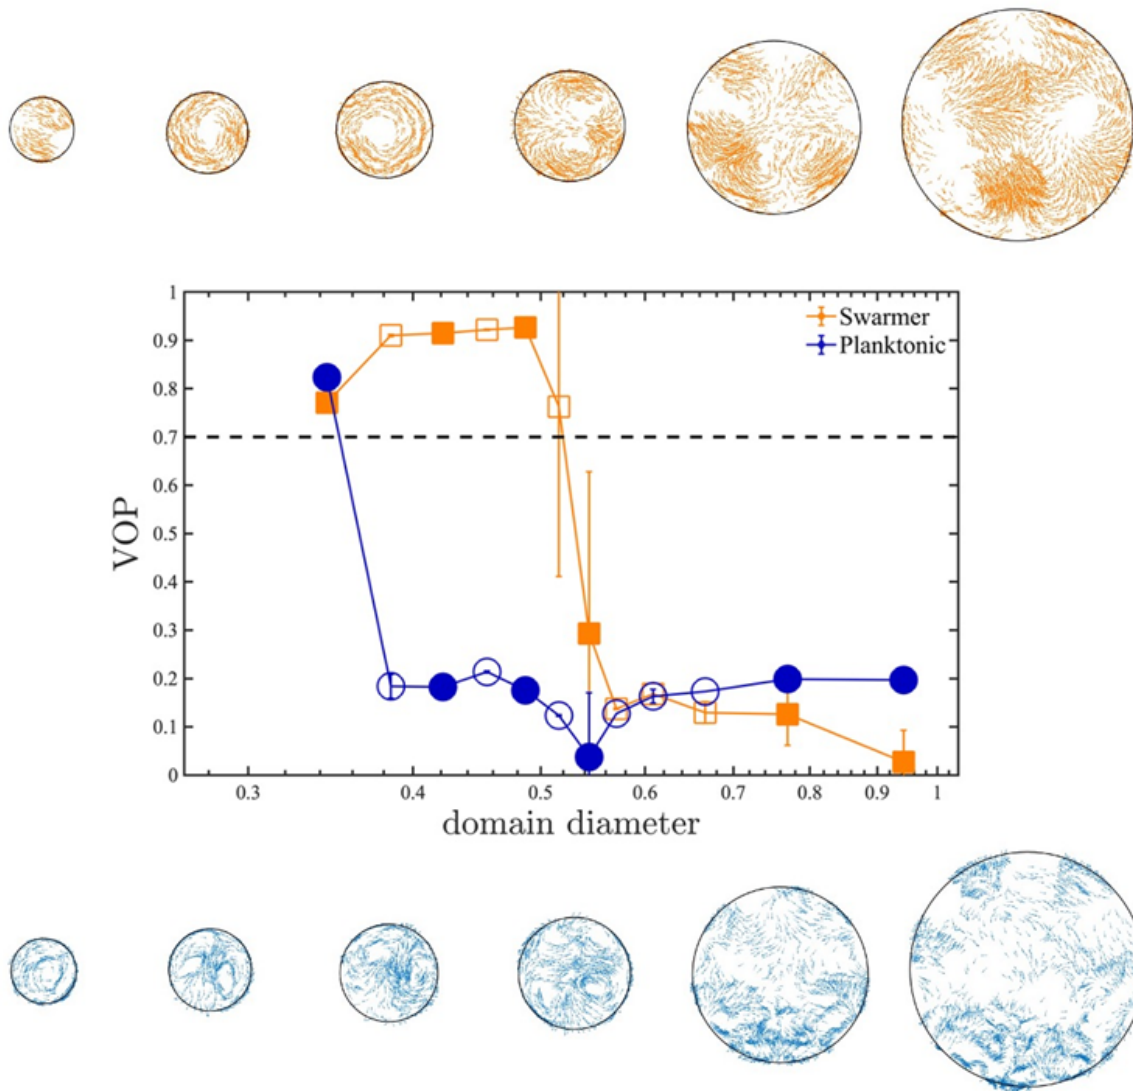

530

531 **Figure S2 | Representative patterns at different sizes of bounded domain.** Top row: Swarming; Bottom  
532 row: Planktonic. The corresponding domain sizes and VOP values are marked as filled symbols. The  
533 particle density is kept constant as the area of the simulated region increases.

534



535 **Figure S3**

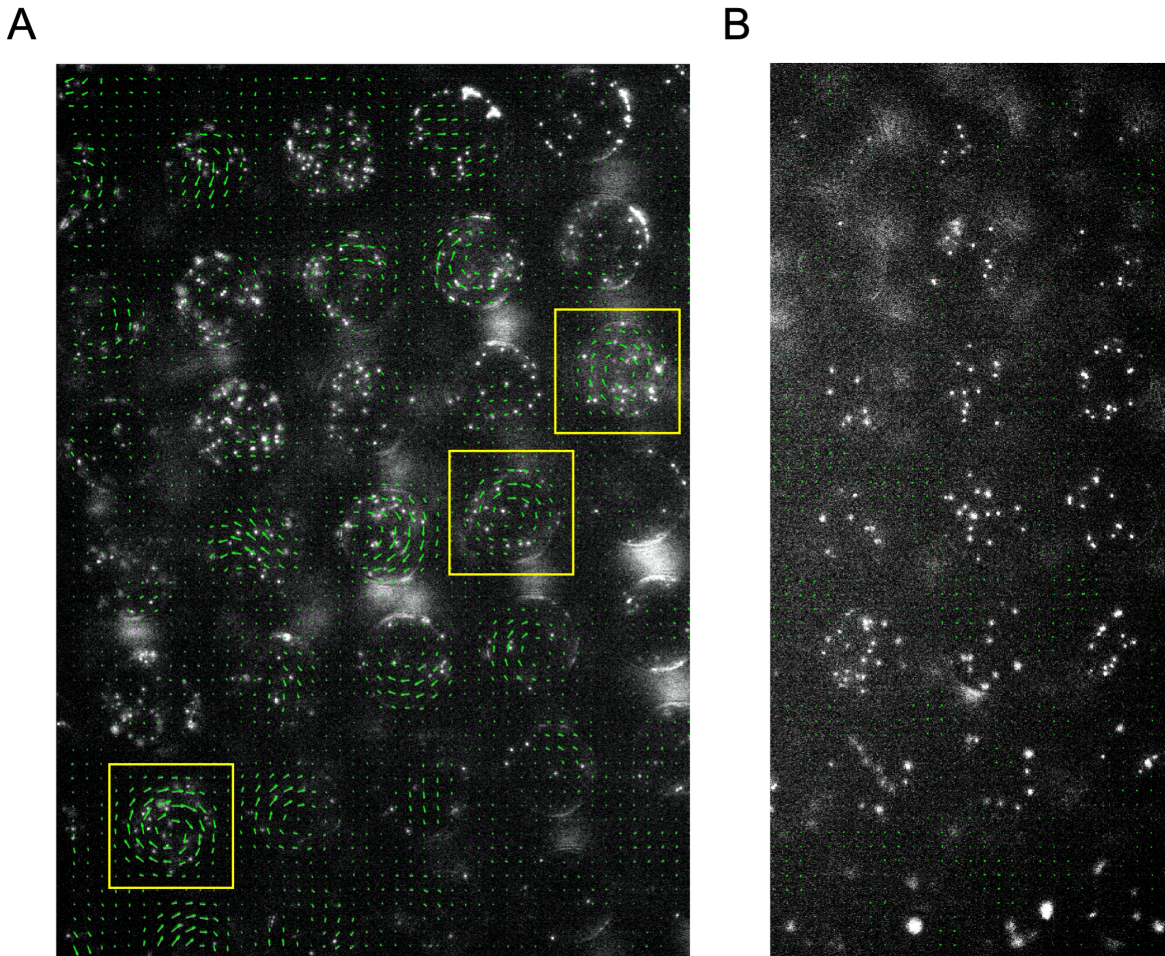

536

537 **Figure S3 | Fluorescent beads motion in microwells mounted on infected murine tissue.** PDMS chips  
538 were coated with 0.5  $\mu\text{m}$  fluorescent beads and mounted on SM3 inoculated colitic (A) or normal (B) mice  
539 intestine tissue surfaces. Average velocity field was calculated by tracing the beads motion using PIV  
540 toolkit. (A) On colitic tissue, wells with  $\text{VOP} > 0.7$  were found and marked with yellow squares. We  
541 conclude that, in these wells, the single swirl motion pattern of the beads was powered by the confined  
542 swarming SM3. Since the tissue surface was not as smooth as on agar surface, the motion of the beads in  
543 some wells did not form a complete vortex, yet jets indicating partial vortices can be seen. (B) On a normal  
544 tissue lacking swarming bacteria, the average velocity of the beads in the wells due to random motion is  
545 close to zero, thus the VOP is uniformly small. We could infer that the confined SM3 in these wells were  
546 predominantly swimming rather than swarming.

## 547 SI Methods

548 **Detecting bacterial motility on mouse intestine tissue using PDMS chips.** Six-week-old female  
549 C57BL/6 mice (Jackson Laboratories, Bar Harbor, ME; #000664) were administered 3%(w/v)  
550 DSS (Dextran Sulfate Sodium) (MPI; # 160110) in animal facility drinking water daily to induce  
551 acute colitis. After 9-12 days, when the mice weight loss reached 20%, mice were euthanized using  
552 isoflurane anesthesia and large intestines were harvested. For control, conventional six-week-old  
553 female C57BL/6 mice exposed to drinking water not containing DSS treatment were also  
554 sacrificed and the intestines were collected. This study was approved by the Institute of Animal  
555 Studies at the Albert Einstein College of Medicine, Inc (IACUC # 20160706 & 00001172).  
556 Intestine tissues were cut open, cleaned with 35%(v/v) ethanol, and rinsed with PBS twice. Tissues  
557 were spread on a 1% agar plate with inner side facing up, and overnight SM3 bacterial culture  
558 were inoculated on one end of the tissue. The agar plate was incubated under 37°C for 4.5 hours  
559 to allow SM3 bacteria to duplicate and move on the tissue surface. PDMS chips ( $d = 38 \mu\text{m}$ ) were  
560 coated with 0.5  $\mu\text{m}$  fluorescent beads (Dragon green; Bangs Laboratory, IN) and cut into strips to  
561 fit the size of the tissue. The PDMS strip was mounted and covered the tissue surface. Bead motion  
562 was observed under the fluorescent microscope (Olympus CKX41) with 20X objectives.

563 **Numerical simulations.** The dynamics of  $N$  interacting active particles have been modeled in a 2-  
564 dimensional space using the overdamped Langevin-based equations, assuming that inertia is  
565 negligible in a low Reynolds number environment. The position  $\mathbf{r}$  and orientation  $\theta$  of particle  $i$   
566 are calculated using the following stochastic differential equations:

$$\partial_t \mathbf{r}_i = v_0 \hat{\mathbf{p}}_i - \sum_{j \neq i} k_{ex} r_{ji} \mathcal{H}(d_{ex} - r_{ji}) + \sqrt{2D_T} \xi_i \quad (1)$$

$$\partial_t \theta_i = \sum_{j \neq i} F_\theta(\mathbf{r}_{ji}, \hat{\mathbf{p}}_i, \hat{\mathbf{p}}_j) + \sqrt{2D_r} \zeta_i \quad (2)$$

567 Based on our experimental observations, bacterial velocity in the suspension is largely independent  
568 of the local cell density. Accordingly, the self-propulsion speed of particles is set to be a constant  
569  $v_0$  along the direction  $\hat{\mathbf{p}}_i = [\cos(\theta_i), \sin(\theta_i)]$ . The second term incorporates the central exclusion  
570 force term with a spring constant  $k_{ex}$  which acts over the relative distance  $r_{ji}$  with all the  
571 neighboring particles  $j$ . This exclusion force term applies only when  $r_{ji}$  gets smaller than the

572 exclusion range  $d_{\text{ex}}$  (represented as a Heaviside function  $H$ ). The last term in Eq. (1) is the  
 573 Brownian fluctuation term with the corresponding translation diffusivity  $D_T$  and  $\xi_i$  is the white  
 574 noise with zero mean and correlation  $\delta(t)$ .

575 The temporal change in the orientation of each particles is influenced by two terms. The first term  
 576 on the right-hand side of Eq. (2) includes all the binary interaction terms. The last term on the  
 577 right-hand side of Eq. (2) is the contribution from the angular Brownian fluctuation with the  
 578 rotational diffusion  $D_r$  and a zero mean and delta-correlated stochastic white noise  $\zeta$ . In the present  
 579 study, we employ the pair-wise interaction model introduced previously<sup>21,22</sup>, which successfully  
 580 reproduces various macroscopic patterns reminiscent of bacterial suspensions. The pair-wise  
 581 interaction term is based on a zonal model (Figure S4 below) which captures the alignment, anti-  
 582 alignment and repulsion effects, and is formulated in the following form<sup>21,22</sup>:

$$F_{\theta}(\mathbf{r}_{ji}, \hat{\mathbf{p}}_i, \hat{\mathbf{p}}_j) = k_r \mathcal{H}(r_r - r_{ji}) \sin(\theta_i - \theta_{ji}) + \mu \sin(\theta_j - \theta_i) \quad (3)$$

583  $k_r$  is the magnitude of the constant repulsion interaction that applies over distance of  $r_r$  around the  
 584 particle (Fig. 1). The second term in Eq. (3) represents the alignment and anti-alignment effects,  
 585 which operate over a range of  $r_a$  and  $r_{aa}$ , respectively. The magnitude of the aligning interaction  $m$   
 586 is distance-dependent and is defined as [1, 2]:

$$\mu = \begin{cases} \mu^+ (1 - (r_{ji}/r_a)^2) & 0 \leq r_{ji} \leq r_a \\ -\mu^- \frac{4(r_{ji} - r_a)(r_{aa} - r_{ji})}{(r_{aa} - r_a)^2} & r_a \leq r_{ji} \leq r_{aa} \end{cases} \quad (4)$$

587 where  $m^+$  and  $m^-$  are the strength of alignment and anti-alignment interactions, respectively.

588 We numerically integrate Eqs. (1) and (2) using the first order Euler scheme. Initially, the particles  
 589 are randomly distributed with random orientations. The integration time step  $\Delta t$  is selected  
 590 sufficiently small to ensure both numerical stability and also independence of long-term statistics  
 591 from  $\Delta t$ . The simulation time is set long enough to let the system reach a dynamic steady-state.  
 592 The interaction of particles with the bounded circular domain is modeled via a reflective boundary  
 593 condition.

594

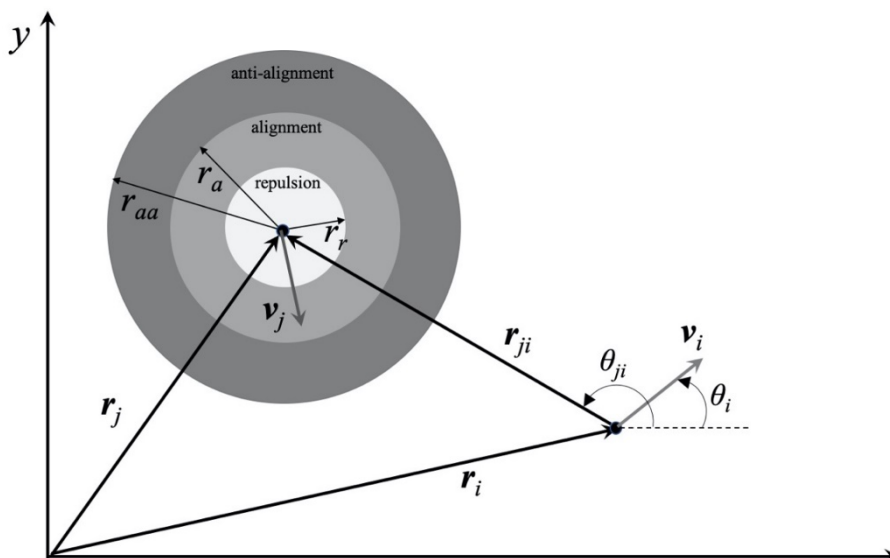

595  
 596 **Figure S4 | Schematic of the zonal pair-wise interaction model showing anti-alignment, alignment,**  
 597 **and repulsion zones with the corresponding interaction radii  $r_{aa}$ ,  $r_a$  and  $r_r$ .**

598  
 599 In order to differentiate the Swarming and Planktonic cases, two different sets of interaction  
 600 parameters have been used, which are summarized in Table 1. The values are unitless. In both  
 601 systems, we set the exclusion parameters  $k_{ex}$  and  $d_{ex}$  to fixed values of 0.02 and 0.035, respectively.  
 602 It is also assumed that particles only experience a rotational diffusion  $D_r$  of 0.75. The simulations  
 603 for both Swarming and Planktonic cases have been performed at two particle densities  $r = N/A_{dom}$ ,  
 604 where  $N$  is the number of particles and  $A$  is the area of the simulation domain. In the high density  
 605 case,  $r = 4300$  and in the diluted case, we set  $r = 235$ . In the diluted case, in order to further  
 606 minimize the boundary effects, we replace the bounded domain with a periodic boundary.

607

|                       |          | <b>Swarming</b> | <b>Planktonic</b> |
|-----------------------|----------|-----------------|-------------------|
| <b>repulsion</b>      | $k_r$    | 2               | 3                 |
|                       | $r_r$    | 0.05            | 0.08              |
| <b>alignment</b>      | $m^+$    | 0.5             | 0.2               |
|                       | $r_a$    | 0.2             | 0.2               |
| <b>Anti-alignment</b> | $m^-$    | 0.5             | 4.0               |
|                       | $r_{aa}$ | 0.25            | 0.25              |

608

**SI Methods Table 1 | Simulation parameters used for the Swarming and Planktonic cases**

609 **SI Movies**

610 All videos play in real time, with the exception of Movie S5 & S6 which were taken in 20 fps but  
611 compressed in 30 fps.

612 **Movie S1: Confined swarming SM3 showing single swirl motion pattern.** Swarming SM3 was  
613 confined in 74  $\mu\text{m}$  diameter PDMS wells.

614 **Movie S2: Confined concentrated planktonic SM3 showing turbulent motion pattern.**  
615 Swimming SM3 was confined in 74  $\mu\text{m}$  diameter PDMS wells.

616 **Movie S3: Diluted swarming SM3 colony.** Swarming SM3 colony edge was diluted by adding a  
617 50  $\mu\text{L}$  water droplet. Clusters of bacteria cells formed rafts.

618 **Movie S4: Diluted swimming SM3 suspension.** Concentrated planktonic SM3 was diluted by  
619 adding a 50  $\mu\text{L}$  water droplet. Bacteria cells were observed to swim independently without  
620 clustering.

621 **Movie S5: Fluorescent beads motion on DSS induced colitic mouse intestine tissue.** The  
622 unidirectional rotation motion in 38  $\mu\text{m}$  diameter wells indicates swarming SM3 on the tissue  
623 surface.

624 **Movie S6: Fluorescent beads motion on normal mouse intestine tissue.** The random motion in  
625 38  $\mu\text{m}$  diameter wells indicates planktonic SM3 on the normal mice tissue surface.

626

627 **Movie S7: Numerical simulations of circularly confined SM3.** Swarming SM3 (left) and  
628 concentrated planktonic SM3 (right) were simulated in the well size of 0.48. The video shows the  
629 representative confined motion pattern. Arrows indicate the moving direction of the particles.

630

631 **Movie S8: Numerical simulations of SM3 cells in open space.** Diluted swarming SM3 (left) and  
632 planktonic SM3 (right) were simulated without confinement with a periodic boundary condition.  
633 Cell density in both cases are  $\rho = 235$ , and the arrows indicate the moving directions of the particles.
